# Supplementary material
Source: MDPI journal article supplement (https://www.mdpi.com/2409-515X/8/3/43)
Supplement: s1 [file s1]

## Supplemental information S1

### Interview Guide

Hello, my name is Kaylee Crossen. I am a genetic counseling graduate student at the University of Cincinnati and Cincinnati Children's Hospital. I am conducting a study to learn parents' experiences receiving a diagnosis of Late-Onset Pompe Disease (LOPD) on newborn screening and their experiences with their child's medical monitoring. Thank you for your interest in this study.

This interview will be conducted in private and will be audio-recorded. The recording will be transcribed. To protect your privacy, you will be assigned a study ID that will be associated with the information you provide. We will remove your name and your child's name and any other identifiers from the transcripts. Only the research team will have access to the documents linking your study ID number and your name.

Demographic questions and open-ended questions will be asked in this interview. There are no right or wrong answers. You do not have to answer every question. You may withdraw from the study at any point if you do not wish to participate.

The answers you provide will help us understand parents' experiences of having a child with LOPD. While there is no direct benefit to you, the information you provide may help other families of children with LOPD or providers.

In order to participate in this study, you must meet the eligibility criteria. I have a few questions to ask you to help determine this.

1. Are you a parent or legal guardian of a child who was diagnosed with Late-Onset Pompe Disease on newborn screening?
2. Are you at least 18 years of age?
3. Has your child started ERT (Enzyme Replacement Therapy) for their LOPD?
4. Does your child have cardiomegaly and cardiomyopathy?

If they meet criteria, continue. If they do not meet criteria, "Thank you for your interest, but unfortunately we cannot continue with the interview."

The interview will take approximately one hour. Is this a good time to speak? (If no, ask for a better date and time)

Do you consent to participate in the interview?

Do you have any questions for me before we begin?

Okay to start, I am going to ask you for brief demographic information to get to know you better.

#### **Demographics:**

1. How old are you?
  - a. Enter age
2. What is your sex?
  - a. Male
  - b. Female
  - c. Prefer not to answer
3. What is your race?
  - a. Caucasian

- b. African American
  - c. Asian
  - d. Hispanic
  - e. Other
4. What is your marital status?
- a. Married
  - b. Divorced
  - c. Single
  - d. Widowed
  - e. Other
5. What is your highest level of education?
- a. Some High School
  - b. High School Degree
  - c. Some College
  - d. College Degree
  - e. Some Graduate School
  - f. Graduate Degree or More
6. How many people, including yourself, live in your household?
- a. Enter Size
7. Does your child with LOPD have public or private insurance?
- a. Public
  - b. Private
  - c. Unknown
8. How old is your child who was diagnosed on newborn screening with LOPD?
- a. Enter Age
9. If you have older children than your child with LOPD, how many were screened for LOPD?
- a. Enter number
10. Of your other children screened for LOPD, how many were diagnosed?
- a. Enter number
  - b. How old are they?
    - i. Enter age
11. Which state do you live in currently?
- a. Enter State:
12. Which state was your child with LOPD born in?
- a. Enter State:
13. How far do you live from the center where your child receives care for LOPD?
- a. Enter distance (in miles):

**Interview:**

*Diagnosis questions:*

Now I am going to ask you about your experience with the diagnosis of LOPD for your child. These questions will be open-ended, and you can share as much or as little as you'd like.

Can you first tell me a little bit about your family such as who makes up your family?

Next, I will ask you about your experiences with Late-Onset Pompe Disease.

I understand your child was diagnosed with Late-Onset Pompe Disease. I would like to know more about how you learned about the diagnosis. Can you tell me more about your experience receiving the diagnosis?

- Probes:
  - How did you learn about the diagnosis?
  - What were you feeling?
    - Compared to now

What does this diagnosis mean to you?

What does the diagnosis mean for your child? – (depending on child's age)

Has this experience influenced how you see your child and their health?

*Medical Monitoring Plan Questions:*

I will now ask you some specific questions about how your child is monitored for LOPD. The following may not all be familiar to you and in no way is this an extensive list of how your child should be followed, as some of these items may not be appropriate for your child and others with LOPD.

1. What providers follow your child for LOPD?
  - ☐ Geneticist
    - i. How often in person? \_\_\_\_\_
    - ii. How often by telemedicine? \_\_\_\_\_
  - ☐ Cardiologist
    - i. How often in person? \_\_\_\_\_
    - ii. How often by telemedicine? \_\_\_\_\_
  - ☐ Pulmonologist
    - i. How often in person? \_\_\_\_\_
    - ii. How often by telemedicine? \_\_\_\_\_
  - ☐ Pediatrician
    - i. How often in person? \_\_\_\_\_
    - ii. How often by telemedicine? \_\_\_\_\_
  - ☐ Other
    - i. \_\_\_\_\_
    - ii. How often in person? \_\_\_\_\_
    - iii. How often by telemedicine? \_\_\_\_\_

Often when your child sees a provider for LOPD, they perform a physical exam, specifically they want to look at their muscle strength. Typically, they look at sitting, head control, walking, and climbing stairs. The next few questions will ask who performs these examinations.

2. Who conducts physical exams for your child for LOPD?
3. How often does your child receive a physical exam for LOPD?
  - ☐ Once a year
  - ☐ Once every 6 months
  - ☐ Once every 3 months
  - ☐ Other \_\_\_\_\_
4. How comfortable are you with this provider conducting a physical exam for LOPD?

5. Do you think other providers should be assessing muscle strength?

Now I will ask you about a few more tests your child receives such as blood and urine screening, heart monitoring, and other assessments.

6. Has your child received blood tests?

☐ Yes

- i. Is your child currently receiving blood tests?

☐ Yes

☐ No

- a. How many blood tests has your child had in the past?

i. \_\_\_\_\_

- ii. Are they checking for:

☐ CK/CPK levels (Creatine Kinase)

☐ Kidney/Liver function (Renal/Hepatic function)

☐ Other \_\_\_\_\_

☐ Unknown

- iii. How Often?

☐ Once a year

☐ Once every 6 months

☐ Once every 3 months

☐ Other \_\_\_\_\_

☐ No

☐ Unknown

7. Has your child received urine tests?

☐ Yes

- i. Is your child currently receiving urine tests?

☐ Yes

☐ No

- a. How many urine tests has your child had in the past?

i. \_\_\_\_\_

- ii. Are they checking for:

☐ Hex4 (Glucotetrasaccharides)

☐ Other \_\_\_\_\_

☐ Unknow

- iii. How Often?

☐ Once a year

☐ Once every 6 months

☐ Once every 3 months

☐ Other \_\_\_\_\_

☐ No

☐ Unknown

8. Has your child received ECGs or EKGs?

An ECG/EKG measures the heartbeat and can identify differences in heart rhythm.

☐ Yes

- i. Is your child currently receiving ECGs/EKGs?

☐ Yes

☐ No

a. How many ECGs/EKGs did your child have in the past?

i. \_\_\_\_\_

ii. How Often?

- ☐ Once a year
- ☐ Once every 6 months
- ☐ Once every 3 months
- ☐ Other\_\_\_\_\_

☐ No

☐ Unknown

9. Has your child received an echo?

An echo is an ultrasound of the heart which helps identify the shape and parts of the heart.

☐ Yes

i. Is your child currently receiving echos?

- ☐ Yes
- ☐ No

a. How many echos did your child have in the past?

i. \_\_\_\_\_

ii. How Often?

- ☐ Once a year
- ☐ Once every 6 months
- ☐ Once every 3 months
- ☐ Other\_\_\_\_\_

☐ No

☐ Unknown

10. Has your child received a Chest X-rays?

☐ Yes

i. Is your child currently receiving Chest X-rays?

- ☐ Yes
- ☐ No

a. How many Chest X-rays has your child had in the past?

i. \_\_\_\_\_

ii. How Often?

- ☐ Once a year
- ☐ Once every 6 months
- ☐ Once every 3 months
- ☐ Other\_\_\_\_\_

☐ No

☐ Unknown

11. Has your child received a Physical Therapy (PT) assessment?

☐ Yes

i. Is your child currently receiving PT assessments?

- ☐ Yes
- ☐ No

a. How many PT assessments has your child had in the past?

i. \_\_\_\_\_

ii. How Often?

- ☐ Once a year
- ☐ Once every 6 months

- ☐ Once every 3 months  
☐ Other\_\_\_\_\_
- ☐ No  
☐ Unknown
12. Has your child had a sleep study?
- ☐ Yes
  - i. Is your child currently receiving sleep studies?
    - ☐ Yes
    - ☐ No
  - a. How many sleep studies has your child had in the past?
    - i. \_\_\_\_\_
  - ii. How Often?
    - ☐ Once a year
    - ☐ Once every 6 months
    - ☐ Once every 3 months
    - ☐ Other\_\_\_\_\_
- ☐ No  
☐ Unknown
13. Has your child received hearing screening?
- ☐ Yes
  - i. Is your child currently receiving hearing tests?
    - ☐ Yes
    - ☐ No
  - a. How many hearing tests has your child had in the past?
    - i. \_\_\_\_\_
  - ii. How Often?
    - ☐ Once a year
    - ☐ Once every 6 months
    - ☐ Once every 3 months
    - ☐ Other\_\_\_\_\_
- ☐ No  
☐ Unknown
14. Has your child received feeding and swallowing testing?
- ☐ Yes
  - i. Is your child currently receiving feeding and swallowing tests?
    - ☐ Yes
    - ☐ No
  - a. How many feeding and swallow tests has your child had in the past?
    - i. \_\_\_\_\_
  - ii. How Often?
    - ☐ Once a year
    - ☐ Once every 6 months
    - ☐ Once every 3 months
    - ☐ Other\_\_\_\_\_
- ☐ No  
☐ Unknown
15. What other tests, assessments, or examinations has your child received?

Thank you for that information. I am now going to ask you more questions about the monitoring plan that has been recommended for your child, specifically about your experiences. Can you tell me more about your experiences with monitoring your child's health?

How do you feel about how your child is monitored for LOPD?

What are your thoughts about the benefits of how your child is currently monitored?

- Probe on whether benefits are tangible and/or emotional

What are your thoughts about the drawbacks of how your child is currently monitored?

- Probe on whether drawbacks are tangible and/or emotional

What barriers do you and your family face with monitoring your child?

- Probe on culture and distance and trust

Tell me about the support you have for managing the diagnosis, your child's health, and monitoring plan.

I am going to continue to ask about the monitoring plan but now I would like to get insight on what you think will work best for your family and child.

Are there any changes you would like to see in how your child is followed? If so, what and why?

Do you have any suggestions you would like to pass on to other parents or to the healthcare providers who follow children with LOPD?

Is there anything else you would like to share that you think is important for providers to know that I have not asked you?

Thank you for your time and participation in this interview!

Supplemental information S2

Codebook

| Category       | Code       | Subcode               | Description                                                                                                          |
|----------------|------------|-----------------------|----------------------------------------------------------------------------------------------------------------------|
| Diagnosis      | Experience | Difficult News        | The family reported they received difficult news                                                                     |
|                |            | Dx Communication      | Ways in which parents were communicated with about diagnosis                                                         |
|                |            | Experience            | General experience parent went through                                                                               |
|                |            | Sibling Testing       | Experience with testing other children                                                                               |
|                |            | Waiting               | Family discussed the wait it took for diagnosis                                                                      |
|                | Knowledge  | Better Understanding  | Parent has better understanding from beginning                                                                       |
|                |            | Child Knowledge       | Knowledge that the child has about visits/Pompe                                                                      |
|                |            | Genetic Terms         | Parent discuss specific terms related to genetics                                                                    |
|                |            | Google                | Parent gained knowledge from Google                                                                                  |
|                |            | Lack of Understanding | Parent had a lack of understanding about diagnosis process                                                           |
|                |            | Parent Knowledge      | Knowledge about Pompe that parent has or lack of knowledge they had/have and what they have researched               |
|                |            | Partner Communication | Parent relays information to partner                                                                                 |
|                |            | Provider Knowledge    | Knowledge providers knew about Pompe                                                                                 |
|                | Labeling   | Label                 | Parent talks about labelling diagnosis in general                                                                    |
|                |            | Label: risk factor    | Parent sees diagnosis as a risk factor                                                                               |
| Hypervigilance |            | High Alert            | in vivo to explain hypervigilance                                                                                    |
|                |            | Hypervigilance        | Parent pays extra attention to child between visits and pays extra attention to their child's health and development |
|                |            | Protective            | Parents are more protective of child                                                                                 |
| Anxiety/Worry  |            | Anxiety               | General anxiety                                                                                                      |
|                |            | Anxiety: future       | Parent is anxious about future for their child                                                                       |
|                |            | Anxiety: heart        | Parent has anxiety for child's heart involvement                                                                     |
|                |            | Anxiety: information  | Parent feels that too much information is anxiety inducing                                                           |

|             |                               |                                                                              |                                                        |
|-------------|-------------------------------|------------------------------------------------------------------------------|--------------------------------------------------------|
|             | Anxiety: labs                 | Parents have anxiety about labs                                              |                                                        |
|             | Anxiety: milestones           | Parents worry about if child will meet milestones                            |                                                        |
|             | Anxiety: onset                | Parents have anxiety about when symptoms will occur                          |                                                        |
|             | Anxiety: telling children     | Parents are nervous about telling child and siblings                         |                                                        |
|             | Anxious Heart                 | in vivo                                                                      |                                                        |
|             | Unnecessary Worry             | Parents worry more than they should while child is asymptomatic              |                                                        |
|             | Worry: insurance              | Parent fears what criteria insurance will cover ERT                          |                                                        |
|             | Worry: more intervention      | Parent is worried child needs more monitoring or interventions               |                                                        |
|             | Worry: older children         | Parent worries other children may be affected after initial diagnosis on NBS |                                                        |
|             | Worry: symptom onset          | Parent worries about disease onset                                           |                                                        |
| Uncertainty | Anticipatory Grief            | Parent experience grief with asymptomatic children                           |                                                        |
|             | Uncertainty                   | General uncertainty                                                          |                                                        |
|             | Uncertainty: dx               | Parent has uncertainty about what diagnosis would be                         |                                                        |
|             | Uncertainty: standard of care | There is uncertainty about the standard of care and what is recommended      |                                                        |
| Emotions    | Negative Emotions             | Desperation                                                                  | Parents feel desperate                                 |
|             |                               | Devastation                                                                  | Parents are devastated and feel devastation            |
|             |                               | Disheartening                                                                | in vivo, response to provider knowledge                |
|             |                               | Exhausted                                                                    | Parents were exhausted during diagnosis process        |
|             |                               | Frustration                                                                  | Parents feel frustration                               |
|             |                               | Grief                                                                        | Parents grieve with new diagnosis and while waiting    |
|             |                               | Heartbroken                                                                  | Parent feels heartbroken (in vivo)                     |
|             |                               | Scared                                                                       | Parents were scared                                    |
|             |                               | Shock                                                                        | Parent felt shock                                      |
|             |                               | Stressful                                                                    | Parent was stressed                                    |
|             |                               | Traumatic                                                                    | Parents report experience of diagnosis to be traumatic |
|             | Confident                     | Parent feels confident with care and future                                  |                                                        |

|                        |                             |                          |                                                                             |
|------------------------|-----------------------------|--------------------------|-----------------------------------------------------------------------------|
|                        | Positive Emotions           | Hope: no progression     | Parent has hope from child being asymptomatic                               |
|                        |                             | Hope: other PD children  | Parent has hope from seeing other PD children doing well                    |
|                        |                             | Hope: research           | Parent has hope that research will bring better surveillance and treatments |
|                        |                             | Hopeful                  | Parent has hope                                                             |
|                        |                             | Peace                    | Parent was able to gain peace                                               |
|                        |                             | Relief                   | Parent is relieved about Late onset vs Infantile onset                      |
|                        |                             | Thankful                 | Parent is thankful and grateful                                             |
|                        | Emotion Changes             | Emotional Improvement    | Parent has better emotions since beginning                                  |
|                        |                             | Reassurance              | Parent has been reassured                                                   |
| Monitoring             | Physical Exam Opinions      | Geneticist Confidence    | Parent is confident with geneticist performing physical exams               |
|                        |                             | Geneticist Doubt         | Parent is not confident with geneticist performing physical exams           |
|                        |                             | Neuromuscular Confidence | Parent is confident with neuromuscular doctor performing physical exams     |
|                        |                             | PCP Doubt                | Parent is not confident with PCP performing physical exams                  |
|                        |                             | PT Confidence            | Parent is confident with PT performing physical exams                       |
|                        | Experiences with Monitoring | Advocacy                 | Parent advocates for child and their care                                   |
|                        |                             | Collaboration            | Parent and Provider collaboration for their child's monitoring              |
|                        |                             | No Monitoring            | Parent does not want to monitor while asymptomatic                          |
|                        |                             | Normalization            | Parent feels that monitoring is just a part of their normal life            |
|                        |                             | PCP Educated             | PCP educated themselves on Pompe                                            |
|                        |                             | Preparedness             | Parents feel prepared and know what will happen during visits               |
|                        |                             | Telehealth               | General experience with telehealth                                          |
| Benefits of Monitoring | Emotional                   | Comfort                  | Comfort comes from monitoring child for symptoms                            |
|                        |                             | Safety                   | Safety comes from monitoring child for symptoms                             |

|                         |                        |                                       |                                                                                                         |
|-------------------------|------------------------|---------------------------------------|---------------------------------------------------------------------------------------------------------|
|                         | Tangible               | Benefit: early detection              | Parents see the benefit of early detection and starting treatment early                                 |
|                         |                        | Benefit: multiple providers           | Parents like that there are multiple providers following child                                          |
|                         |                        | Benefit: providers                    | Providers make the appointments easier and provide information well                                     |
|                         |                        | Minimization                          | Parent's providers are eliminating unnecessary tests                                                    |
| Drawbacks of Monitoring | Emotional              | Drawback: asymptomatic                | There is many visits while asymptomatic                                                                 |
|                         | Tangible               | Drawback: older children              | Older children have difficulties going to appointments and missing school                               |
|                         |                        | Drawback: provider understanding      | Some providers do not understand their need for Pompe                                                   |
|                         |                        | Drawback: repeated tests              | There are many tests that are repeated while normal                                                     |
|                         |                        | Drawback: schedule                    | Between multiple kids, appointments and school it is difficult to schedule                              |
|                         |                        | Drawback: time                        | The time appointments take is a drawback                                                                |
|                         |                        | Drawback: waiting                     | Parent does not like waiting for initial visit of other visits                                          |
|                         |                        | Drawback: worry                       | Parents worry about every visit                                                                         |
| Barriers and Challenges |                        | Barrier                               | Parent discusses what barrier they face                                                                 |
|                         |                        | Challenge: insurance                  | Parent had difficult with testing or monitoring being covered                                           |
|                         |                        | Challenge: provider                   | Parents did not agree or work well with providers                                                       |
|                         |                        | Challenge: telehealth                 | Telehealth is challenge for parent to inform specialist                                                 |
|                         |                        | Challenge: work                       | Parent takes off work for visits                                                                        |
| Desires                 | Changes for Diagnosis  | Recommendation: initial news          | Parents would like to see change in how the initial news is given                                       |
|                         |                        | Recommendation: join community sooner | Parents would like to get involved with support groups sooner                                           |
|                         |                        | Recommendation: mindful               | Parents would like providers to be mindful of situation (trainee was not experienced)                   |
|                         | Changes for Monitoring | Change: less visits                   | Parents would like less visits to decrease how overwhelming they will be if child is still asymptomatic |

|                              |                                       |                                                                                               |
|------------------------------|---------------------------------------|-----------------------------------------------------------------------------------------------|
|                              | Change: provider communication        | Parents would like providers to communicate more about child                                  |
|                              | Recommendation: anticipatory guidance | Parents would like more information about other older children with LOPD                      |
|                              | Recommendation: Duke                  | Parent recommends that other parents follow with Duke                                         |
|                              | Recommendation: prepare               | Parent would like providers to be more prepared to see child                                  |
|                              | Recommendation: proactive             | Parents would like other parents to be proactive about child's health                         |
|                              | Recommendation: prognosis             | Parents would like more prognosis information                                                 |
| Coping Strategies            | Coping: distraction                   | Parents distract themselves to cope                                                           |
|                              | Coping: focus                         | Parents do not focus on the disease to cope, they resume as if life was normal                |
|                              | Coping: information                   | Parents cope by having more information                                                       |
|                              | Coping: monitoring                    | Parents find monitoring their health is a way of coping                                       |
|                              | Coping: no coping                     | Parents could not cope with information                                                       |
|                              | Coping: positivity                    | Parent remains positive                                                                       |
|                              | Coping: prognosis                     | Parents think knowing prognosis will help to cope                                             |
|                              | Coping: risk factor                   | Parents think not labeling with a disease is a way to cope                                    |
| Support Systems for Families | Support: facebook groups              | Parents find support from Facebook Support Groups                                             |
|                              | Support: family                       | Parents say that their family offers emotional support                                        |
|                              | Support: other medical parent         | Parent finds support from another parent who had a child who went through a different disease |
|                              | Support: other PD parents             | Parents find support from other PD parents                                                    |
|                              | Support: PCP                          | Parents feel supported by their pediatrician                                                  |
|                              | Support: religion                     | Parents feel supported through their religion                                                 |
|                              | Support: social work                  | Parent had social worker for support                                                          |
|                              | Support: work                         | Parent feels supported by bosses and coworkers                                                |
| Other/Uncategorized          | Change In Behavior                    | Parent's behaviors has changed since diagnosis                                                |
|                              | Change In Lifestyle                   | Parent's lifestyle has changes from diagnosis                                                 |

---

|                    |                                                                                  |
|--------------------|----------------------------------------------------------------------------------|
| COVID              | Parent talks about COVID-19 and pandemic                                         |
| Crutch             | Parent thinks child may use diagnosis as crutch                                  |
| Curse              | in vivo, parent says diagnosis is like a curse                                   |
| Difficult Days     | in vivo, Parents still have difficult days of coping                             |
| Family Planning    | Parent discusses their decisions having more children                            |
| Idle Hands         | in vivo, Parent had idle hand during wait for diagnosis to Google information    |
| Infantile          | Parent talks about infantile form                                                |
| Medical Background | Parent has medical background which influences understanding and self monitoring |
| Postpartum Effects | Parent expressed emotions were stronger due to postpartum effects                |
| Proactive          | Parent is proactive with children's health and monitoring                        |
| Research           | Child is in a research study                                                     |

---
